# Supplementary material for: Ubiquitin-proteasome system modulates zygotic genome activation in early mouse embryos and influences full-term development
Source: PubMed Central journal article supplement — J Reprod Dev. 2017 Dec 7;64(1):65–74. doi: 10.1262/jrd.2017-127 (PMC5830360; doi:10.1262/jrd.2017-127), 2017-12-07
Supplement: jrd-64-065-s001.pdf [file jrd-64-065-s001.pdf]

### Supplementary Figure 1.

#### Delay of DNA replication by a transient inhibition of DNA replication.

EdU incorporation images in untreated (upper panel) and aphidicolin-treated embryos (lower panel). Representative images of embryos stained with DAPI (blue) and EdU (green) are shown. Arrowheads indicate representative EdU-positive nuclei in zygote. ♀, female pronucleus; ♂, male pronucleus; hpi, hours post-insemination; scale bar = 50  $\mu$ m.

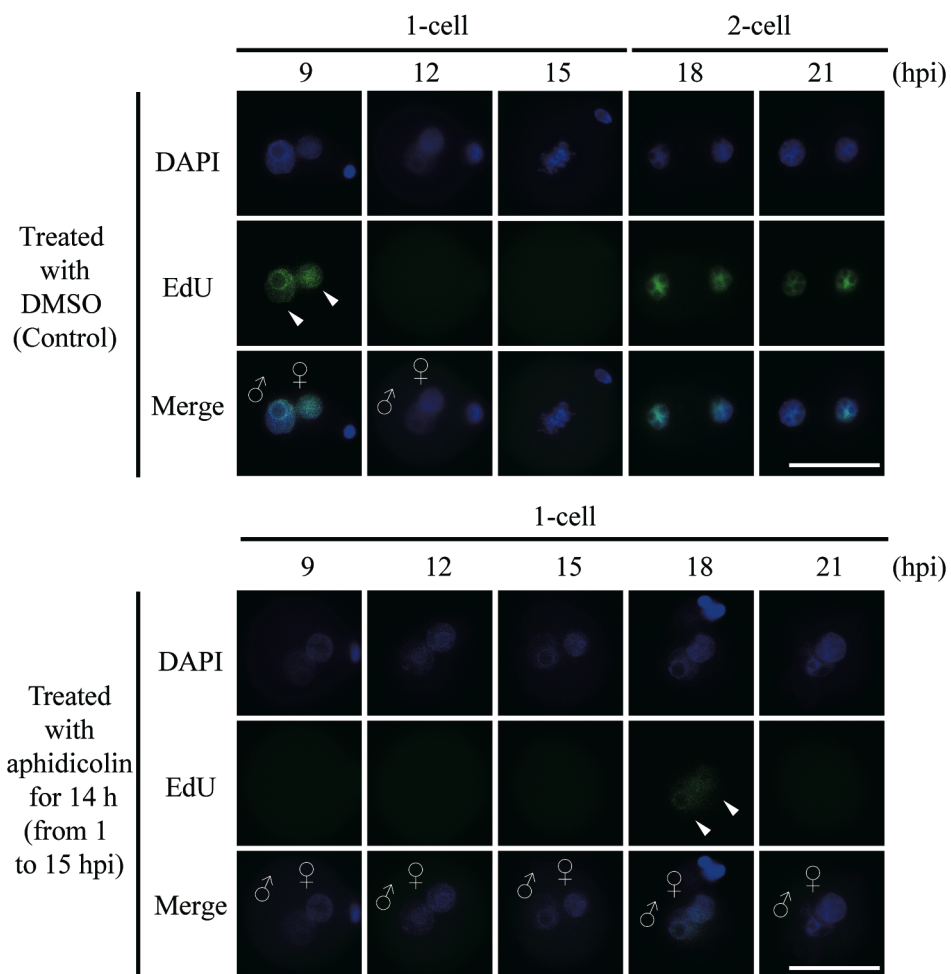

**Supplementary Table 1.** Information of primers

| Name       | Sequences (5' to 3')  | Amplicon length (bp) | Application |
|------------|-----------------------|----------------------|-------------|
| Apex1-FWD  | TCCATTCTTTGTGCCGTGAG  | 270                  | RT-qPCR     |
| Apex1-REV  | ATTTGCCACTGGGTGAGGTT  |                      | RT-qPCR     |
| Dppa2-FWD  | TTTTAACGCTGGTCCCCTTT  | 142                  | RT-qPCR     |
| Dppa2-REV  | CTGGTTGGGTGTTTGATTCC  |                      | RT-qPCR     |
| Dppa3-FWD  | AGCCGTACCTGTGGAGAACAA | 186                  | RT-qPCR     |
| Dppa3-REV  | GGCTCACTGTCCCGTTCAAA  |                      | RT-qPCR     |
| Dppa4-FWD  | GTCTTTTGGAAGCTGGGAGAA | 140                  | RT-qPCR     |
| Dppa4-REV  | GAGCCGTGCTTGGTTGACTA  |                      | RT-qPCR     |
| Fbxo15-FWD | AGGAGAGCGGGCATTAAACAA | 233                  | RT-qPCR     |
| Fbxo15-REV | AAATCAGGAAGGCAGGCAGA  |                      | RT-qPCR     |
| Kpna2-FWD  | CAGCTCCTTTCCTGATGATGC | 131                  | RT-qPCR     |
| Kpna2-REV  | TAGCTTGGAGCTGGCTTTCC  |                      | RT-qPCR     |
